# Supplementary material
Source: PubMed Central journal article supplement (PMC5432205)
Supplement: NIHMS855279-supplement-Appendix.pdf [file NIHMS855279-supplement-Appendix.pdf]

## Appendix 1: Examples of boundary negotiating artifacts used in provider-patient collaboration with patient-generated data

| Artifact type    | Purpose                                                                                                                                                                                                                                                                                | Example                                                                                                                                                                                                                                                                                                                                                                                                                                                                                                                                                                                                                                                                                                                                                                                                                                                                                                                              |
|------------------|----------------------------------------------------------------------------------------------------------------------------------------------------------------------------------------------------------------------------------------------------------------------------------------|--------------------------------------------------------------------------------------------------------------------------------------------------------------------------------------------------------------------------------------------------------------------------------------------------------------------------------------------------------------------------------------------------------------------------------------------------------------------------------------------------------------------------------------------------------------------------------------------------------------------------------------------------------------------------------------------------------------------------------------------------------------------------------------------------------------------------------------------------------------------------------------------------------------------------------------|
| Self-explanation | <p>Artifacts created for personal use.</p> <p>Patients usually track food intake and symptoms using their preferred tools and format, but sometimes use tools suggested by their health provider.</p>                                                                                  | <div style="display: flex; align-items: flex-start;"> <div style="flex: 1;"> 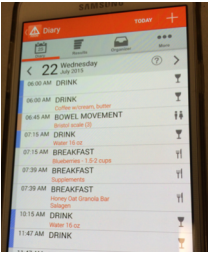 </div> <div style="flex: 2;"> <p>Some patients create their own diaries or find tools themselves. This patient used mySymptoms to track food intake, symptoms, and medications.</p> </div> <div style="flex: 1;">  </div> </div>                                                                                                                                                                                                                                                                                                                                                                                                                                                   |
| Inclusion        | <p>Artifacts created through a negotiation process to facilitate discussion.</p> <p>Patients present and discuss self-tracking data in the clinic. Providers often make notes to capture information that complements tracked data.</p>                                                | <div style="display: flex; align-items: flex-start;"> <div style="flex: 1;">  </div> <div style="flex: 2;"> <p>One provider took notes while reviewing data. The notes included details the patient verbally supplemented and the provider's medical assessment.</p> </div> <div style="flex: 1;">  </div> </div>                                                                                                                                                                                                                                                                                                                                                                                                                                               |
| Compilation      | <p>Artifacts used to facilitate sharing and coordinate information among parties.</p> <p>After reviewing patient tracked data and assessing medical history and test results, providers create compilation artifacts.</p>                                                              | <p>One provider summarized her review of a patient diary in the medical record:</p> <p>Review of her food symptom journal that she brought with her today revealed that with worsening symptoms the patient's diet consisted more of high fat foods, FODMAP's and gluten. High-fat foods included foods such as steak, barbecue ribs. High FODMAP foods included onions, cucumber, and sugary foods. Gluten products included bagels. When this was compared to her diet when she was not having aggravated symptoms, patient also had evidence of some high-fat foods and gluten products but less FODMAP's. These high-fat foods included sausage and pork roast. High FODMAP foods included onions.</p> <p>The notes in the medical record also include a description of the patient's current illness, previous medical history, a series of test results, medication, and recommendation for further treatment and revisit.</p> |
| Structuring      | <p>Artifacts created to coordinate information use and activities involved in the collaboration.</p> <p>Providers and patients create plans after negotiating and compiling information. Providers offer handouts that can be structuring artifacts to help patients follow plans.</p> | <div style="display: flex; align-items: flex-start;"> <div style="flex: 1;">  </div> <div style="flex: 2;"> <p>One provider and her patient decided to adopt the low FODMAP diet after reviewing patient's food and symptom diary. The review suggested patient's symptoms might be a result of poor absorption of FODMAP food. The provider printed a handout the patient could refer to help follow the diet plan.</p> </div> </div>                                                                                                                                                                                                                                                                                                                                                                                                           |
